# Supplementary material for: Non-doped OLEDs based on tetraphenylethylene phenanthroimidazoles with negligible efficiency roll-off: effects of end group regulated stimulus responsive AIE luminogens
Source: Royal Society of Chemistry journal article supplement (doi:10.1039/d1ma00391g), 2021-01-01
Supplement: d1ma00391g1.pdf [file d1ma00391g1.pdf]

## Supporting information

**Non-doped OLEDs based on tetraphenylethylene phenanthroimidazoles with negligible efficiency roll-off: Effect of end groups regulated stimuli responsive AIE luminogens**

**Jayaraman Jayabharathi\*, Shanmugam Thilagavathy, Venugopal Thanikachalam**

*Department of Chemistry, Annamalai University, Annamalai nagar, Tamilnadu- 608 002, India*

\* Address for correspondence

Dr. J. Jayabharathi  
Professor of Chemistry  
Department of Chemistry  
Annamalai University  
Annamalai nagar 608 002  
Tamilnadu, India.  
Tel: +91 9443940735  
E-mail: jtchalam2005@yahoo.co.in

## Contents

SI-I: Figures

SI-II: Tables

Scheme S1. Synthetic route of emissive materials.

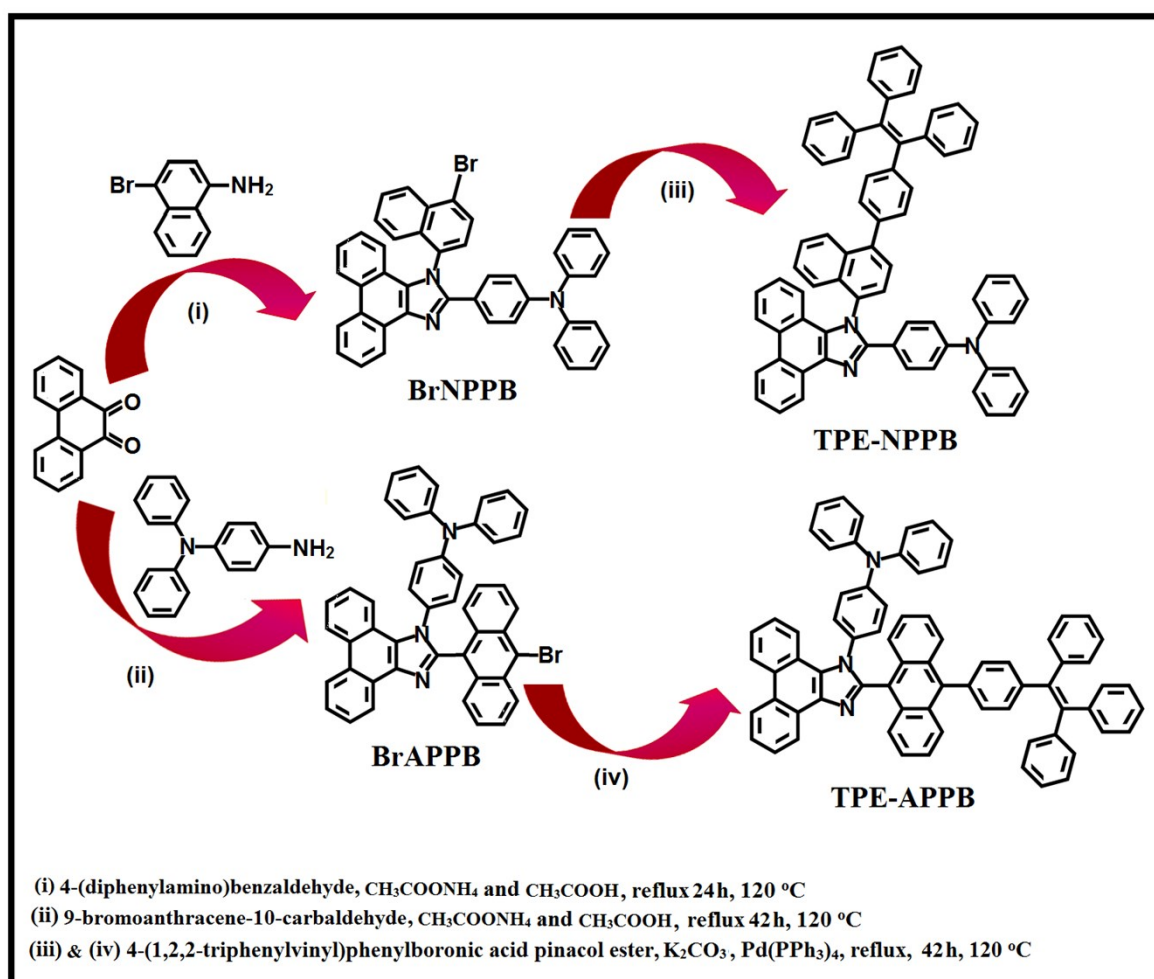

**Scheme S2.** Mass spectra of BrNPPB, BrAPPB, TPE-NPPB and TPE-APPB.

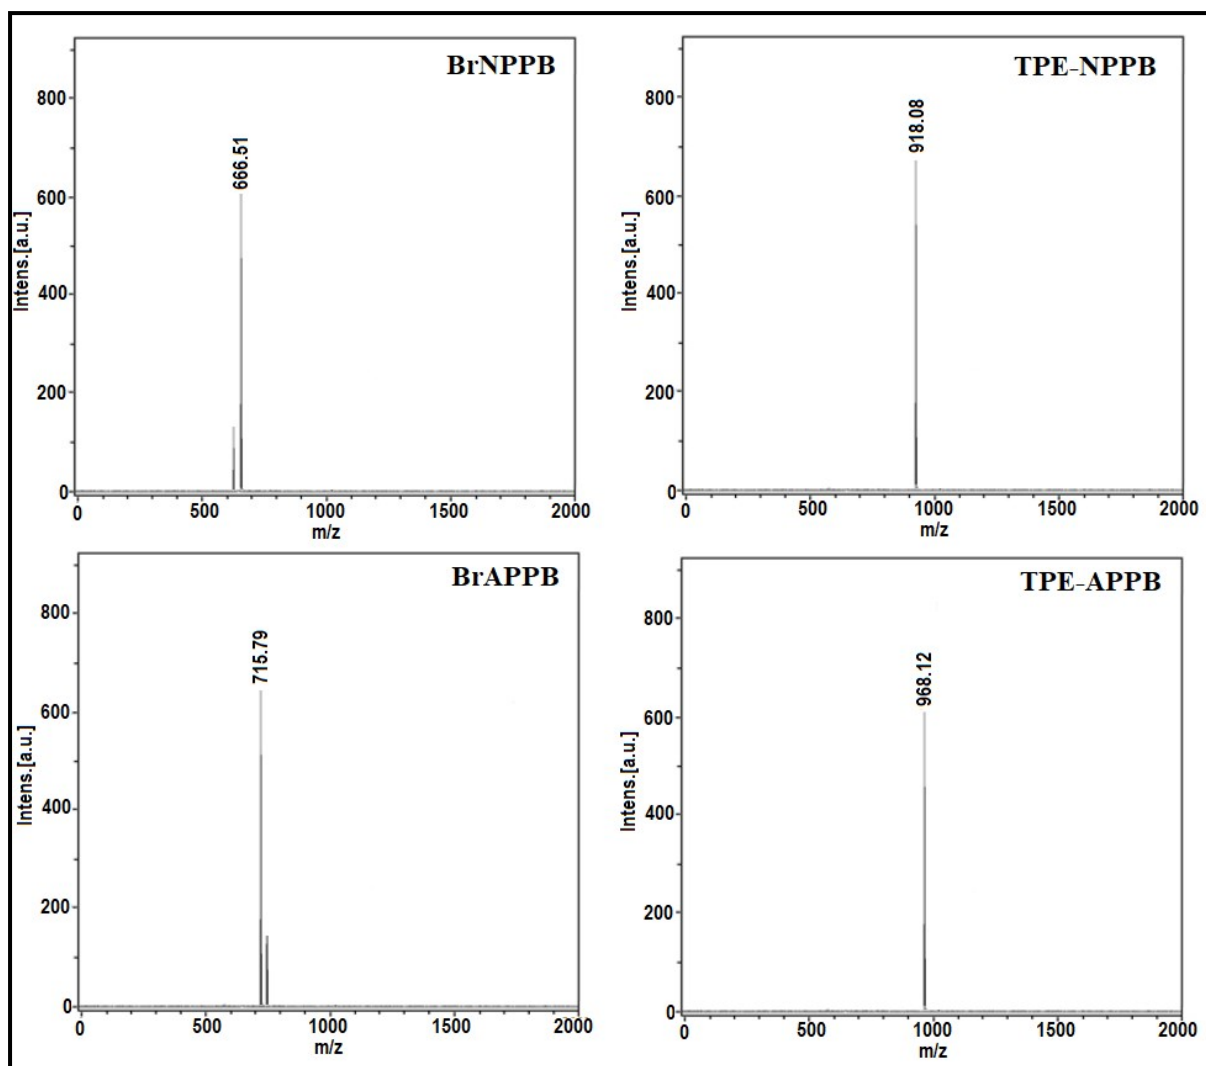

## SI-I: Figures

**Figure S1.** Frontier molecular orbitals of TPE-NPPB and TPE-APPB.

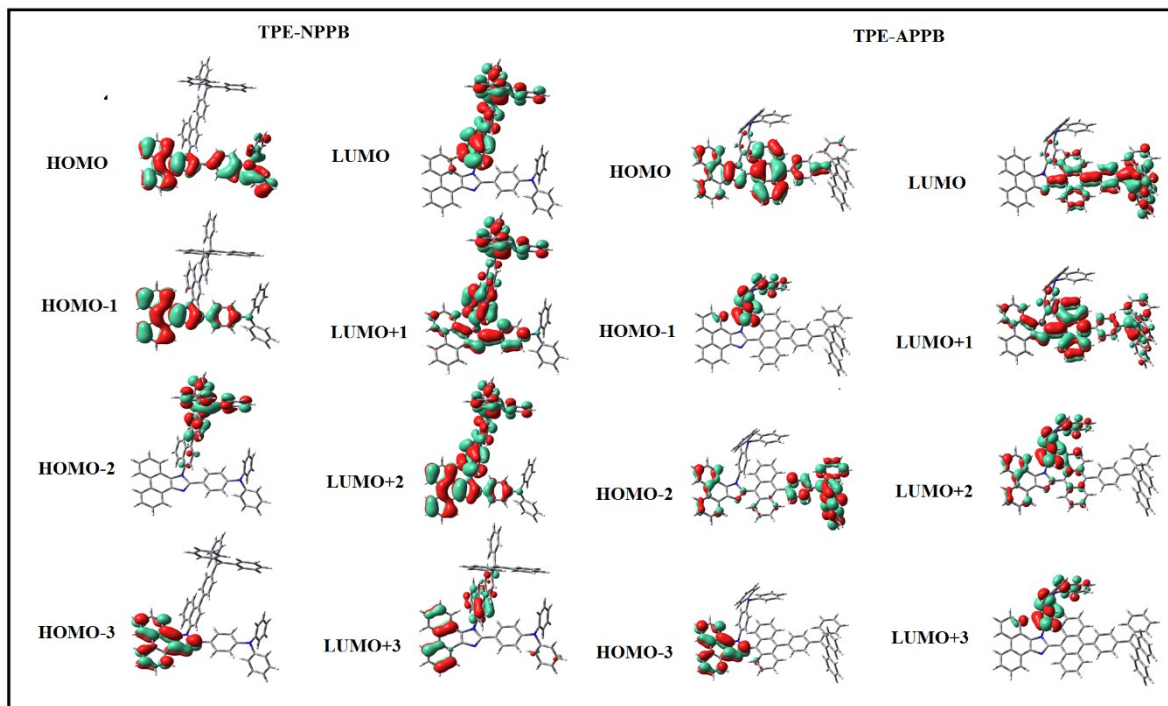

**Figure S2.** Natural transition orbital pairs (NTOs) with transition character analysis for singlet states of (HONTOs and LUNTOs): (a) TPE-NPPB and (b) TPE-APPB [ $f$ -oscillator strength and % weights of hole-particle].

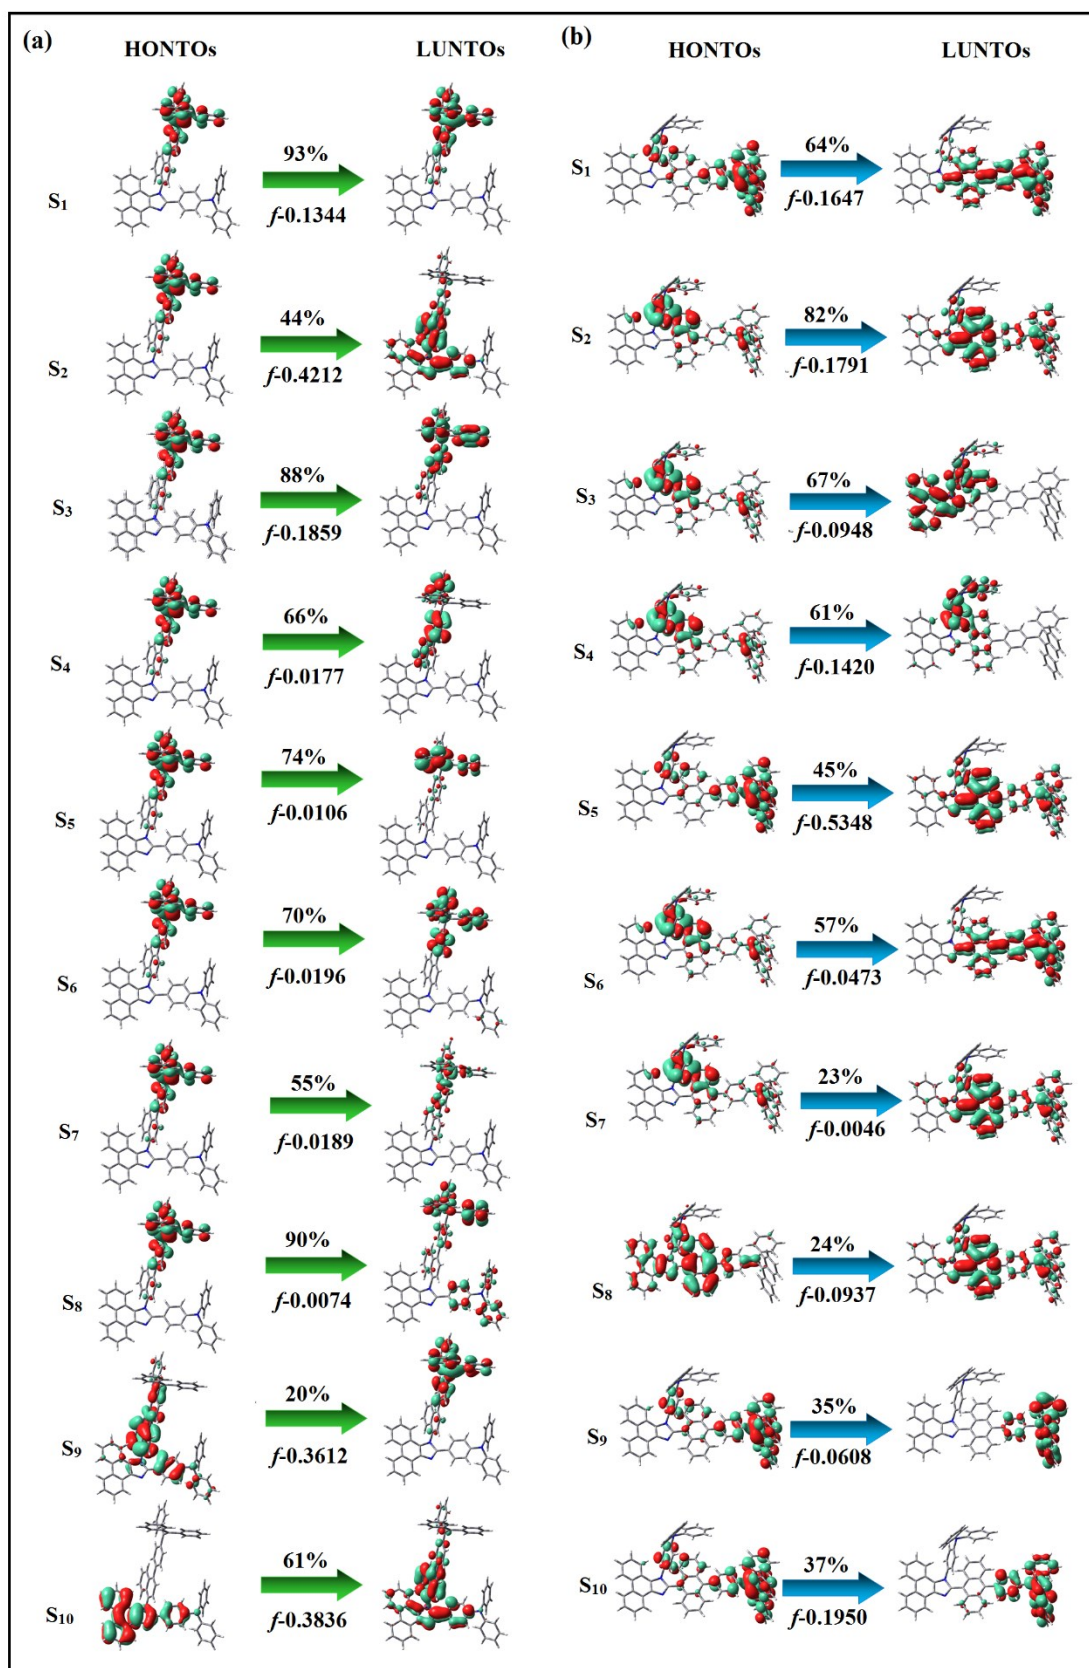

**Figure S3.** Solvatochromic emission spectra of (a) TPE-NPPB and (b) TPE-APPB.

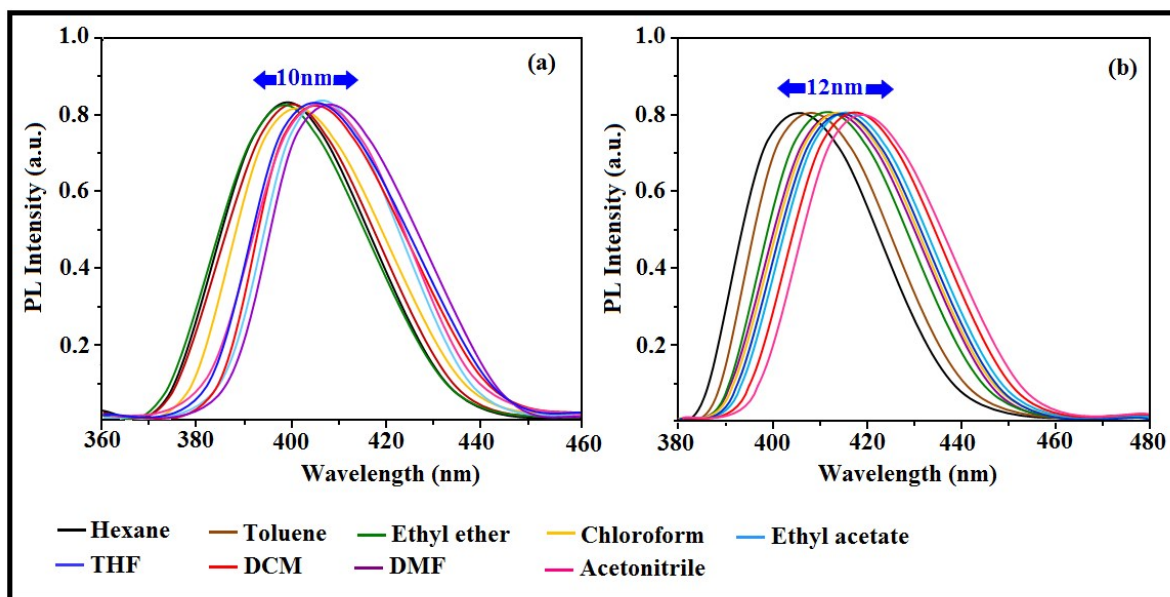

**Figure S4.** Solvatochromic absorption spectra of (a) TPE-NPPB and (b) TPE-APPB.

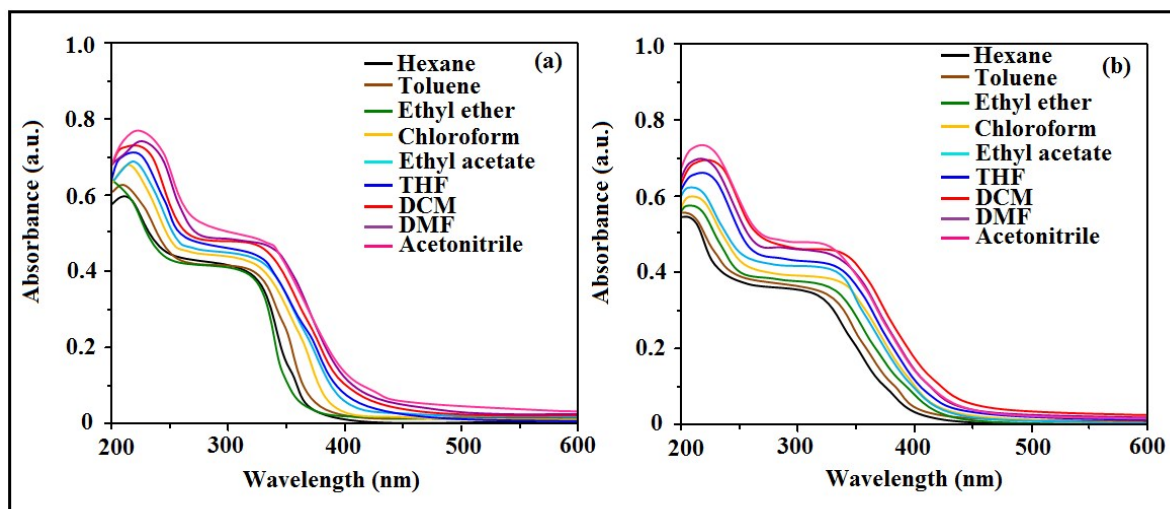

**Figure S5.** (a) Emission spectra at 90% THF-Water mixture and (b) Intensity vs. Water fraction (%) of TPE-NPPB and TPE-APPB.

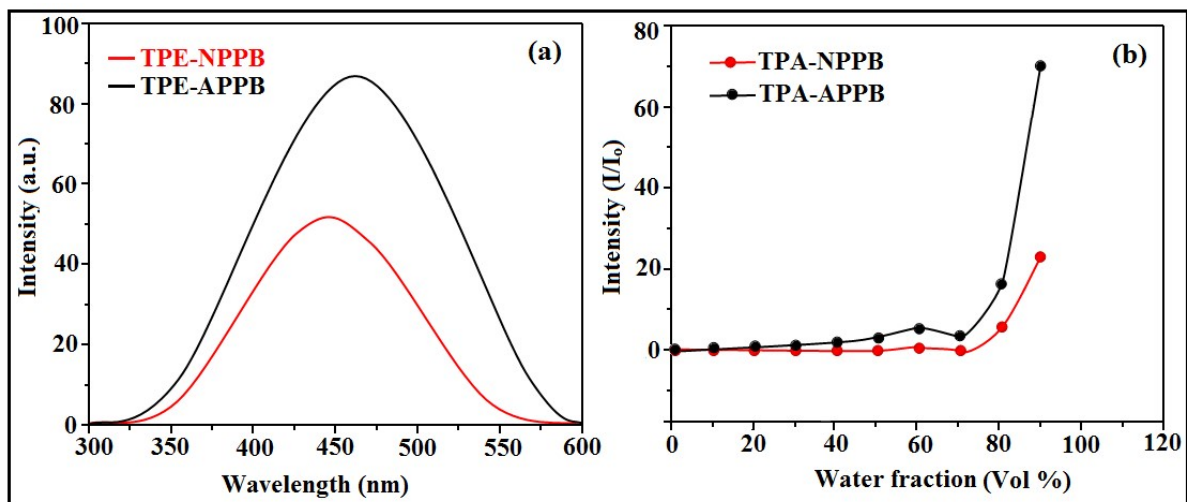



**Figure S6.** Absorption spectra in THF-water mixtures with different water fractions of (a) TPE-NPPB and (b) TPE-APPB.

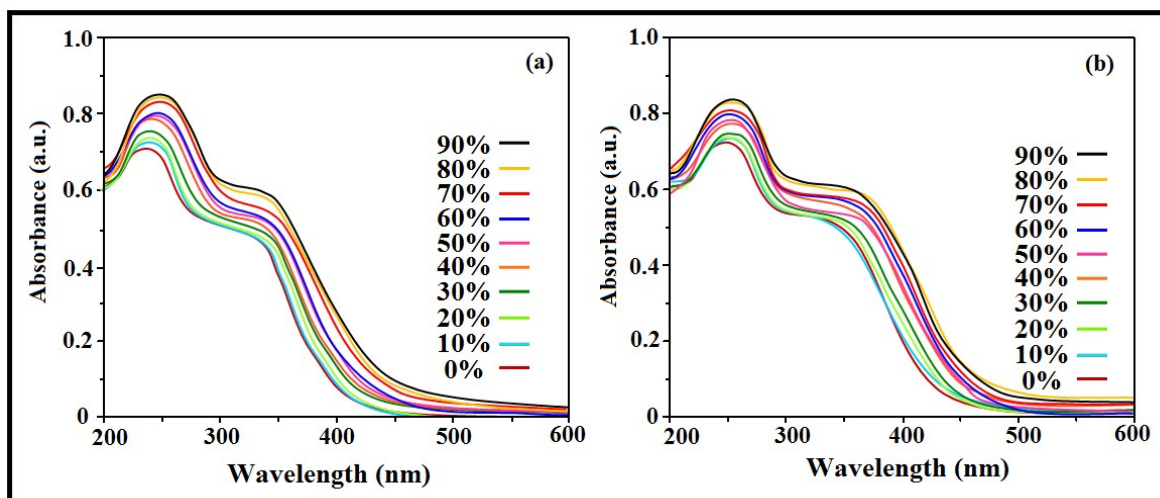

## SI-II: Tables

**Table S1.** Computed [zindo (Singlet or Triplet, n states=10)] singlet ( $E_S$ ) and triplet ( $E_T$ ) energies (eV), oscillator strength ( $f$ ), dipole moment ( $\mu$ , D) and singlet-triplet splitting ( $\Delta E_{ST}$ , eV) of TPE-NPPB from NTOs.

| Energy level | $E_S$ | Oscillator strength ( $f$ ) | $\mu$ | NTO Transitions                         |
|--------------|-------|-----------------------------|-------|-----------------------------------------|
| 1            | 0.81  | 0.1344                      | 0.03  | <sup>93%</sup><br>169 $\rightarrow$ 170 |
| 2            | 2.79  | 0.4212                      | 4.30  | <sup>44%</sup><br>169 $\rightarrow$ 171 |
| 3            | 3.04  | 0.1859                      | 2.97  | <sup>88%</sup><br>169 $\rightarrow$ 181 |
| 4            | 3.15  | 0.0177                      | 3.25  | <sup>66%</sup><br>169 $\rightarrow$ 179 |
| 5            | 3.21  | 0.0106                      | 3.35  | <sup>74%</sup><br>169 $\rightarrow$ 182 |
| 6            | 3.23  | 0.0196                      | 1.44  | <sup>70%</sup><br>169 $\rightarrow$ 183 |
| 7            | 3.30  | 0.0189                      | 0.78  | <sup>55%</sup><br>169 $\rightarrow$ 193 |
| 8            | 3.33  | 0.0074                      | 2.73  | <sup>90%</sup><br>169 $\rightarrow$ 185 |
| 9            | 3.39  | 0.3612                      | 1.44  | <sup>20%</sup><br>167 $\rightarrow$ 170 |
| 10           | 3.42  | 0.3836                      | 2.47  | <sup>61%</sup><br>168 $\rightarrow$ 171 |

**Table S2.** Computed [zindo (Singlet or Triplet, n states=10)] singlet ( $E_S$ ) and triplet ( $E_T$ ) energies (eV), oscillator strength ( $f$ ), dipole moment ( $\mu$ , D) and singlet-triplet splitting ( $\Delta E_{ST}$ , eV) of TPE-APPB from NTOs.

| Energy level | $E_S$ | Oscillator strength ( $f$ ) | $\mu$ | NTO Transitions                         |
|--------------|-------|-----------------------------|-------|-----------------------------------------|
| 1            | 0.80  | 0.1647                      | 0.20  | <sup>64%</sup><br>177 $\rightarrow$ 179 |
| 2            | 1.42  | 0.1791                      | 4.90  | <sup>82%</sup><br>178 $\rightarrow$ 180 |
| 3            | 1.92  | 0.0948                      | 0.76  | <sup>67%</sup><br>178 $\rightarrow$ 181 |
| 4            | 2.22  | 0.1420                      | 1.19  | <sup>61%</sup><br>178 $\rightarrow$ 184 |
| 5            | 2.38  | 0.5348                      | 5.79  | <sup>45%</sup><br>177 $\rightarrow$ 180 |
| 6            | 2.54  | 0.0473                      | 9.69  | <sup>57%</sup><br>178 $\rightarrow$ 179 |
| 7            | 2.71  | 0.0046                      | 1.81  | <sup>23%</sup><br>178 $\rightarrow$ 180 |
| 8            | 2.81  | 0.0937                      | 1.81  | <sup>24%</sup><br>176 $\rightarrow$ 180 |
| 9            | 2.86  | 0.0608                      | 1.83  | <sup>35%</sup><br>177 $\rightarrow$ 190 |
| 10           | 3.01  | 0.1950                      | 3.11  | <sup>37%</sup><br>177 $\rightarrow$ 189 |

**Table S3:** Photophysical properties of TPE-NPPB in different solvents.

| Solvents      | $\epsilon$ | <b>n</b> | <b>f</b><br>( $\epsilon, n$ ) | $\lambda_{ab}$<br>(nm) | $\nu_{ab}$<br>( $\text{cm}^{-1}$ ) | $\lambda_{flu}$<br>(nm) | $\nu_{flu}$<br>( $\text{cm}^{-1}$ ) | $\nu_{ss}$<br>( $\text{cm}^{-1}$ ) |
|---------------|------------|----------|-------------------------------|------------------------|------------------------------------|-------------------------|-------------------------------------|------------------------------------|
| Hexane        | 1.88       | 1.37     | 0.0004                        | 329                    | 30395.13                           | 398                     | 25125.62                            | 5269.50                            |
| Toluene       | 2.38       | 1.49     | 0.014                         | 330                    | 30303.03                           | 399                     | 25062.65                            | 5240.37                            |
| Ethyl ether   | 4.34       | 1.35     | 0.167                         | 328                    | 30487.80                           | 400                     | 25000.00                            | 5487.80                            |
| Chloroform    | 4.81       | 1.44     | 0.148                         | 330                    | 30303.03                           | 402                     | 24875.62                            | 5427.40                            |
| ethyl acetate | 6.09       | 1.41     | 0.186                         | 334                    | 29940.11                           | 406                     | 24630.54                            | 5309.57                            |
| THF           | 7.52       | 1.40     | 0.209                         | 332                    | 30120.48                           | 403                     | 24813.09                            | 5306.58                            |
| DCM           | 9.08       | 1.42     | 0.218                         | 333                    | 30030.03                           | 402                     | 24875.62                            | 5154.40                            |
| DMF           | 36.7       | 1.42     | 0.276                         | 334                    | 29940.11                           | 408                     | 24509.80                            | 5430.31                            |
| acetonitrile  | 37.5       | 1.34     | 0.305                         | 331                    | 30211.48                           | 404                     | 24752.47                            | 5459.00                            |

**Table S4:** Photophysical properties of TPE-APPB in different solvents.

| <b>Solvents</b> | <b><math>\epsilon</math></b> | <b>n</b> | <b>f<br/>(<math>\epsilon, n</math>)</b> | <b><math>\lambda_{ab}</math><br/>(nm)</b> | <b><math>\nu_{ab}</math><br/>(<math>\text{cm}^{-1}</math>)</b> | <b><math>\lambda_{flu}</math><br/>(nm)</b> | <b><math>\nu_{flu}</math><br/>(<math>\text{cm}^{-1}</math>)</b> | <b><math>\nu_{ss}</math><br/>(<math>\text{cm}^{-1}</math>)</b> |
|-----------------|------------------------------|----------|-----------------------------------------|-------------------------------------------|----------------------------------------------------------------|--------------------------------------------|-----------------------------------------------------------------|----------------------------------------------------------------|
| Hexane          | 1.88                         | 1.37     | 0.0004                                  | 346                                       | 28901.73                                                       | 406                                        | 24630.54                                                        | 4271.19                                                        |
| Toluene         | 2.38                         | 1.49     | 0.014                                   | 348                                       | 28735.63                                                       | 408                                        | 24509.80                                                        | 4225.82                                                        |
| Ethyl ether     | 4.34                         | 1.35     | 0.167                                   | 349                                       | 28653.29                                                       | 412                                        | 24271.84                                                        | 4381.45                                                        |
| Chloroform      | 4.81                         | 1.44     | 0.148                                   | 350                                       | 28571.42                                                       | 414                                        | 24154.58                                                        | 4416.83                                                        |
| ethyl acetate   | 6.09                         | 1.41     | 0.186                                   | 349                                       | 28653.29                                                       | 413                                        | 24213.07                                                        | 4440.22                                                        |
| THF             | 7.52                         | 1.40     | 0.209                                   | 348                                       | 28735.63                                                       | 416                                        | 24038.46                                                        | 4697.17                                                        |
| DCM             | 9.08                         | 1.42     | 0.218                                   | 351                                       | 28490.02                                                       | 417                                        | 23980.81                                                        | 4509.21                                                        |
| DMF             | 36.7                         | 1.42     | 0.276                                   | 348                                       | 28735.63                                                       | 414                                        | 24154.58                                                        | 4581.04                                                        |
| acetonitrile    | 37.5                         | 1.34     | 0.305                                   | 347                                       | 28818.44                                                       | 418                                        | 23923.44                                                        | 4894.99                                                        |
